# Supplementary material
Source: PubMed Central journal article supplement (PMC2546528)
Supplement: NIHMS60814-supplement-si20050806_122.pdf [file NIHMS60814-supplement-si20050806_122.pdf]

## ***SUPPORTING INFORMATION***

### **Fluoride Selective Optical Sensor Based on Aluminum(III)- Octaethylporphyrin in Thin Polymeric Film: Further Characterization and Practical Application**

**Ibrahim H. A. Badr<sup>1</sup> and Mark E. Meyerhoff\***

Department of Chemistry, The University of Michigan, 930 N. University,

Ann Arbor, MI 48109-1055

<sup>1</sup> On leave from the Department of Chemistry, Faculty of Science, Ain-Shams University, Cairo, Egypt.

\* To whom correspondence should be addressed at E-mail: mmeyerho@umich.edu; phone: (734) 763-5916; fax: (734) 647-4865.

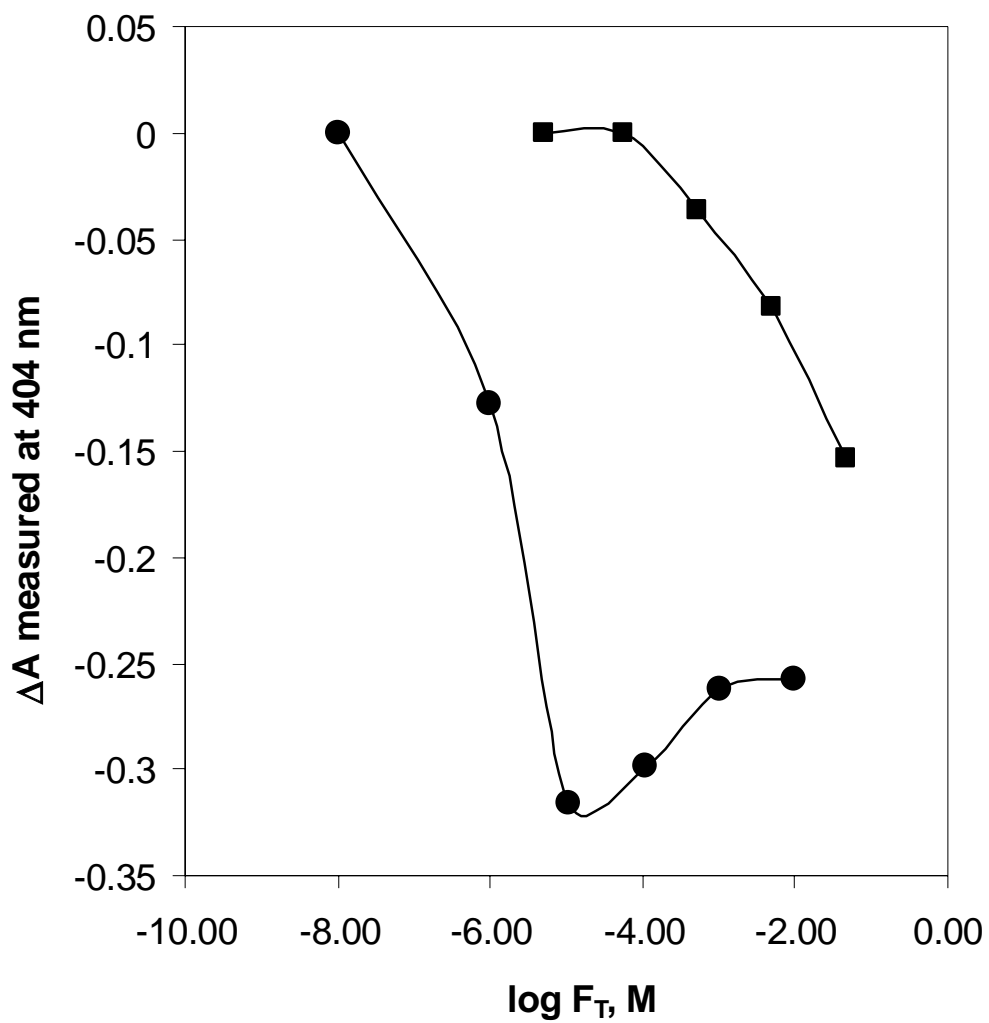

**Fig. 1s** Absorbance change of fluoride optical sensitive film containing Al[OEP] and 100 mol % TFPB, Film-3, measured in 50 mM glycine-phosphate, pH 3.00, when exposed to different concentrations of the following: tetrabutylammonium fluoride (●), and sodium fluoride (■)

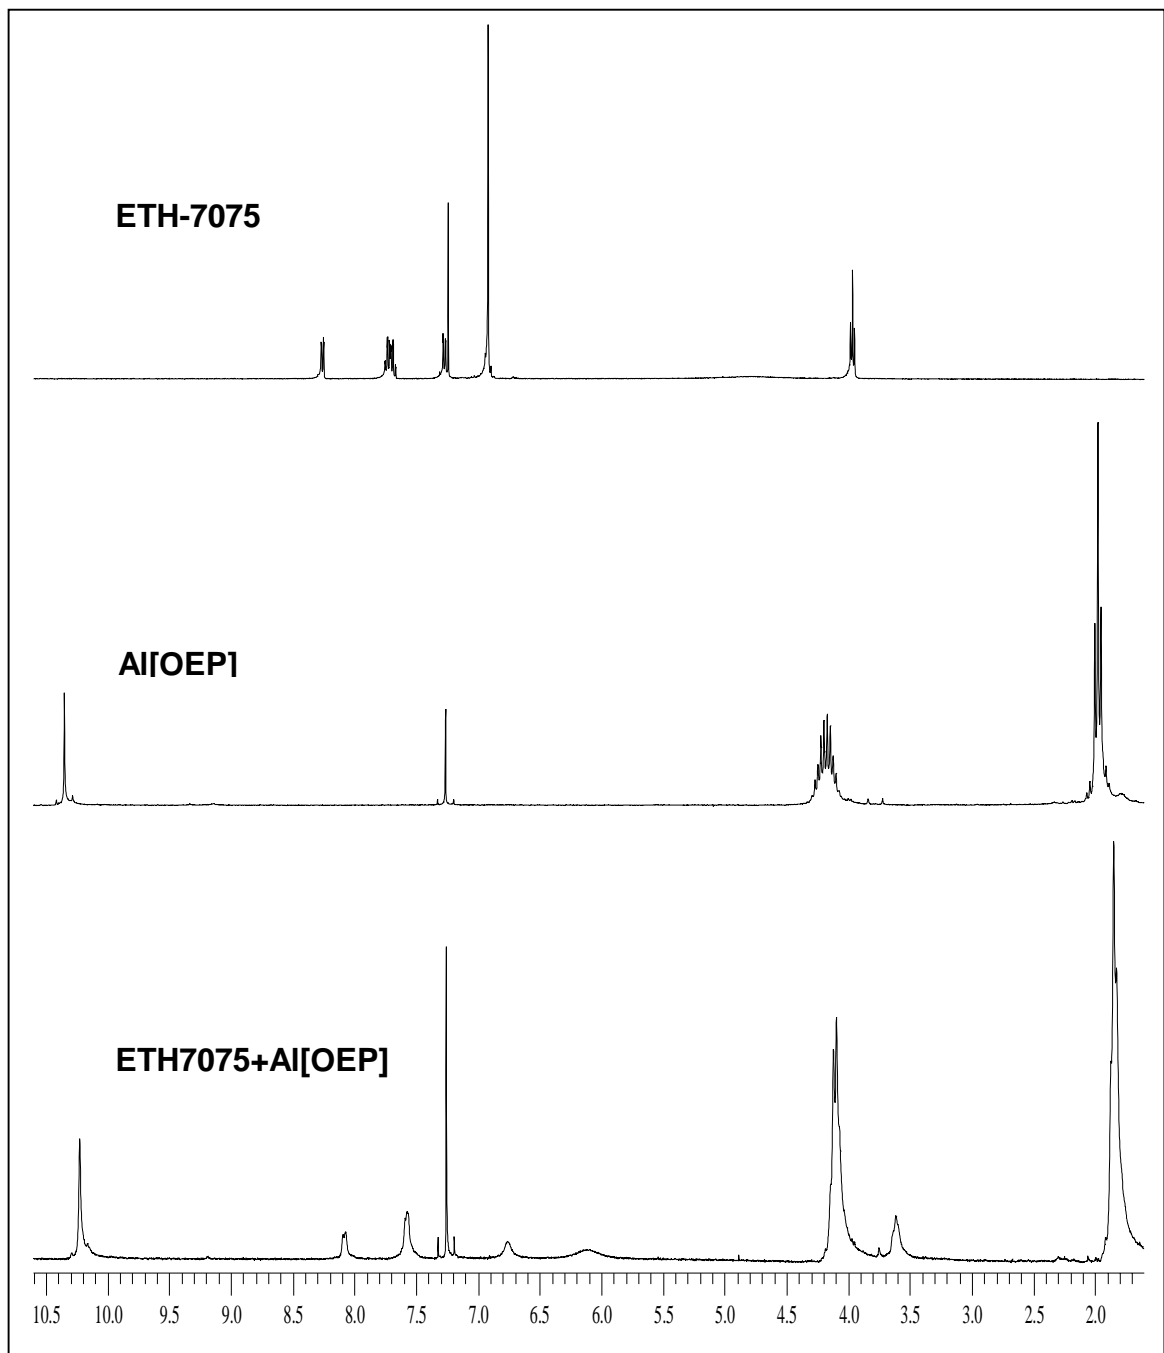

**Fig. 2s**  $^1\text{H}$  NMR spectra of ETH-7075, Al[OEP], and a mixture of ETH-7075 and Al[OEP] measured in deuterated chloroform.

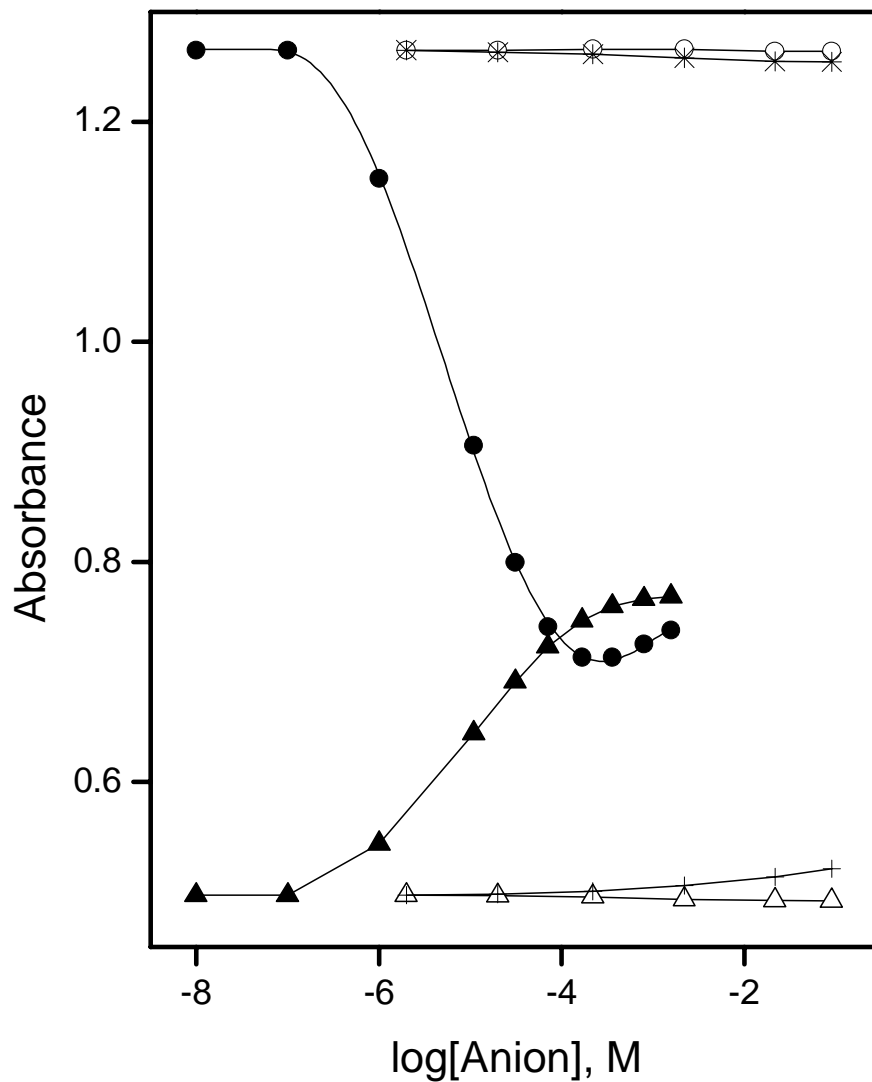

**Fig. 3s** Absorbance change of Al[OEP]/ETH-7075 based fluoride optical sensitive film, Film-6, measured in 100 mM  $\beta$ -alanine-phosphate buffer, 1 mM CDTA, pH 3.6, toward various anions: (●) fluoride, (⊗) perchlorate, and (○) thiocyanate ~ nitrate ~ bromide ~ chloride ~ sulfate measured at 410 nm; (▲) fluoride, (+) perchlorate, and (△) thiocyanate ~ nitrate ~ bromide ~ chloride ~ sulfate measured at 392 nm.

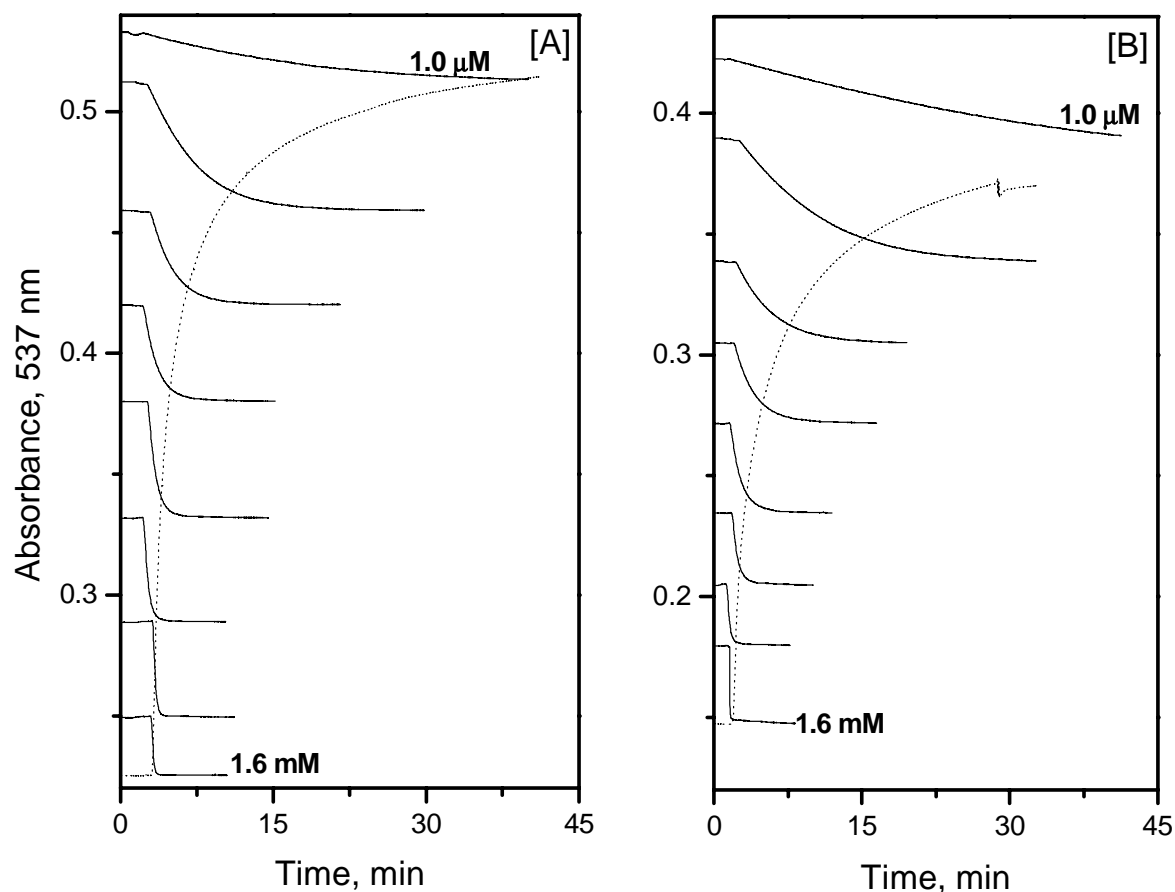

**Fig. 4s** Typical response and recovery times of Al[OEP]/ETH-7075 based fluoride optical sensing films prepared using o-NPOE [A], and DOS [B] as plasticizers. Measurements were performed in 100 mM  $\beta$ -alanine-phosphate buffer, 1 mM CDTA, pH 3.6, at different fluoride ion concentrations (from top): 1.0, 11, 31, and 71  $\mu\text{M}$ , and 0.17, 0.36, 10.8 and 1.6 mM. Dashed line is the recovery time trace when changing the sample from 1.6 mM to fluoride-free buffer solution.
